# Supplementary material
Source: PubMed Central journal article supplement (PMC9085845)
Supplement: 41598_2022_11532_MOESM2_ESM.pdf [file 41598_2022_11532_MOESM2_ESM.pdf]

# Death

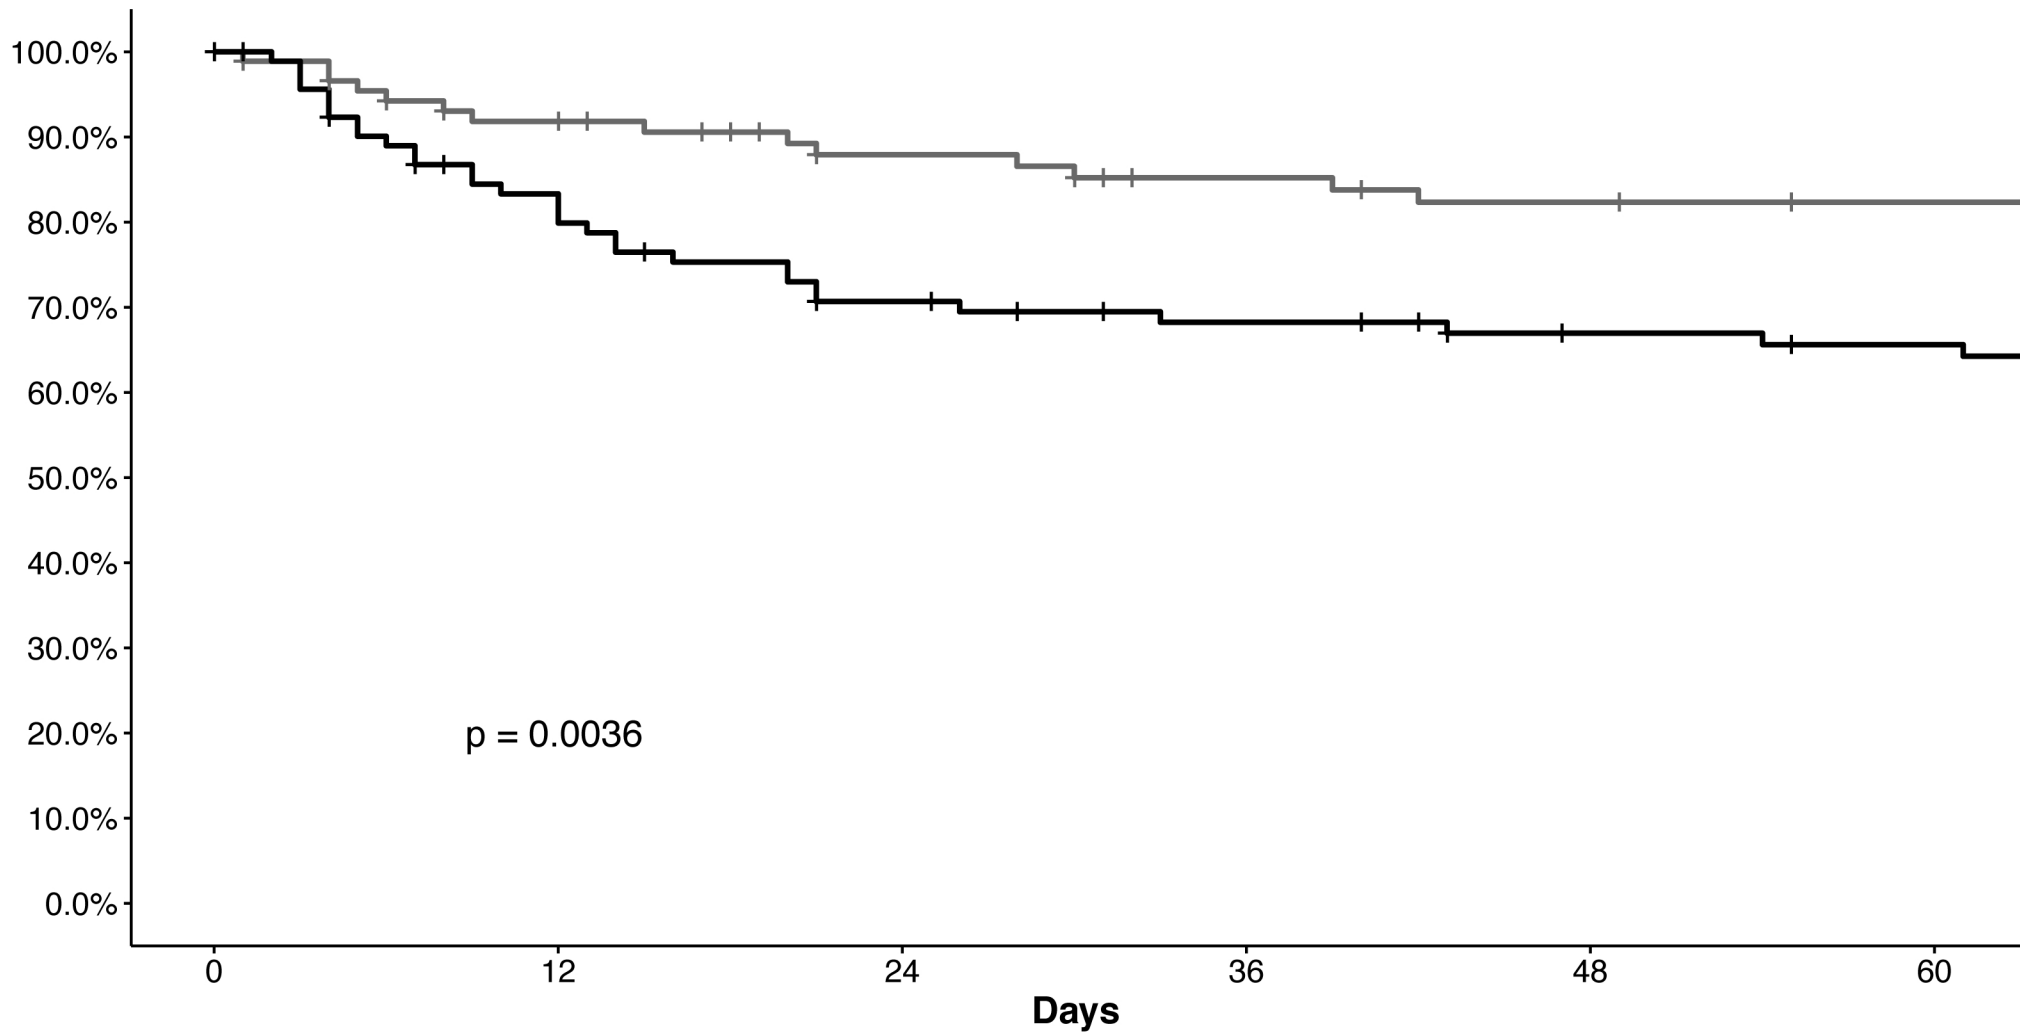

## Number at risk

|             | 0  | 12 | 24 | 36 | 48 | 60 |
|-------------|----|----|----|----|----|----|
| YKL-40 low  | 95 | 76 | 65 | 60 | 57 | 55 |
| YKL-40 high | 96 | 73 | 60 | 55 | 50 | 48 |

Legend + YKL-40 low + YKL-40 high
